# Supplementary material for: A non-invasive method to assess environmental contamination with avian pathogens: beak and feather disease virus (BFDV) detection in nest boxes
Source: PeerJ. 2020 Jun 11;8:e9211. doi: 10.7717/peerj.9211 (PMC7293853; doi:10.7717/peerj.9211)
Supplement: Supplemental Information 2 — The raw data on BFDV status of nest swabs (derived from qPCR assays for all three test groups of nest boxes. It also contains data on number of eggs, hatching and fledging success for all tested nests containing BFDV positive vs BFDV negative birds. [file peerj-08-9211-s002.xlsx]

## Sheet: complete_sorted
Well	Replicate	Fluorophore	Sample Type	Sample Name	Target	Cq	Quantity	Omitted	Description	Cq Difference	Average	Cq min	Cq max	date run	sampl date	site	box	paired ctrl?	phase	comments
C03-Ch1		FAM	Unknown	5738		39.37	NaN			#VALUE!	39.37	39.37	39.37	2019-01-29	2017-09-19	BB	C4		before
A15-Ch1		FAM	Unknown	5500	nest	35.4	NaN			-0.07	35.435	35.4	35.47	2018-12-11	2016-11-25	BB	C4		during
F09-Ch1		FAM	Unknown	5765		37.53	NaN			0.94	37.06	36.59	37.53	2019-01-29	2017-01-31	BB	C4		after
C09-Ch1		FAM	Unknown	5741		NaN	NaN			#VALUE!	#DIV/0!	0	0	2019-01-29	2016-09-19	BB	C3	pc x BB C4	before
A09-Ch1		FAM	Unknown	5501		NaN	NaN			#VALUE!	37.47	37.47	37.47	2019-01-29	2016-11-25	BB	C3	pc x BB C4	during
A15-Ch1		FAM	Unknown	5773		NaN	NaN		nest swab	#VALUE!	#DIV/0!	0	0	2019-01-31	2017-01-31	BB	C3	pc x BB C4	after
D09-Ch1		FAM	Unknown	5822		NaN	NaN			#VALUE!	#DIV/0!	0	0	2019-06-27	2016-09-23	ST	W8	hc x BB C4	before
D01-Ch1		FAM	Unknown	5818		NaN	NaN			#VALUE!	#DIV/0!	0	0	2019-06-27	2016-11-07	ST	W8	hc x BB C4	during
E01-Ch1		FAM	Unknown	5826		NaN	NaN			#VALUE!	#DIV/0!	0	0	2019-06-27	2017-02-07	ST	W8	hc x BB C4	after	PB
D13-Ch1		FAM	Unknown	5751		38.47	NaN			0.29	38.325	38.18	38.47	2019-01-29	2017-08-24	ME	E4		before
A15-Ch1		FAM	Unknown	5508		33.92	NaN			0.01	33.915	33.91	33.92	2019-01-29	2017-11-13	ME	E4		during
E13-Ch1		FAM	Unknown	5759		NaN	NaN			#VALUE!	#DIV/0!	0	0	2019-01-29	2018-01-31	ME	E4		after
D11-Ch1		FAM	Unknown	5750		39.46	NaN			#VALUE!	39.46	39.46	39.46	2019-01-29	2017-08-24	ME	E6	pc x ME E4	before
B01-Ch1		FAM	Unknown	5509		34.47	NaN			0.28	34.33	34.19	34.47	2019-01-29	2017-11-13	ME	E6	pc x ME E2	during
E15-Ch1		FAM	Unknown	5760		36.49	NaN			-0.19	36.585	36.49	36.68	2019-01-29	2018-01-31	ME	E6	pc x ME E4	after
C11-Ch1		FAM	Unknown	5815		NaN	NaN			#VALUE!	#DIV/0!	0	0	2019-06-27	2017-08-22	BB	C15	hc x ME E4	before
A09-Ch1		FAM	Unknown	5798		NaN	NaN			#VALUE!	#DIV/0!	0	0	2019-06-27	2017-11-14	BB	C15	hc x ME E4	during
E09-Ch1		FAM	Unknown	5830		NaN	NaN			#VALUE!	#DIV/0!	0	0	2019-06-27	2018-02-02	BB	C15	hc x ME E4	after	PB
C01-Ch1		FAM	Unknown	5782		NaN	NaN		nest swab	#VALUE!	#DIV/0!	0	0	2019-01-31	2017-08-24	ME	N1		before
B07-Ch1		FAM	Unknown	5512		38.19	NaN			#VALUE!	38.19	38.19	38.19	2019-01-29	2017-11-27	ME	N1		during
A13-Ch1		FAM	Unknown	5772		NaN	NaN		nest swab	#VALUE!	#DIV/0!	0	0	2019-01-31	2018-01-31	ME	N1		after
B07-Ch1		FAM	Unknown	5777		38.46	NaN		nest swab	0.49	38.215	37.97	38.46	2019-01-31	2017-08-24	ME	E7	pc x ME N1	before
B09-Ch1		FAM	Unknown	5513		NaN	NaN			#VALUE!	#DIV/0!	0	0	2019-01-29	2017-11-27	ME	N2	pc x ME N1	during
B15-Ch1		FAM	Unknown	5781		36.75	NaN		nest swab	-0.53	37.015	36.75	37.28	2019-01-31	2018-01-31	ME	E7	pc x ME N1	after
C09-Ch1		FAM	Unknown	5814		NaN	NaN			#VALUE!	#DIV/0!	0	0	2019-06-27	2017-09-21	ST	W7	hc x ME N1	before
C01-Ch1		FAM	Unknown	5810		NaN	NaN			#VALUE!	#DIV/0!	0	0	2019-06-27	2017-11-12	ST	W7	hc x ME N1	during
D07-Ch1		FAM	Unknown	5821		NaN	NaN			#VALUE!	#DIV/0!	0	0	2019-06-27	2018-01-31	ST	W7	hc x ME N1	after	PB
C13-Ch1		FAM	Unknown	5743		NaN	NaN			#VALUE!	#DIV/0!	0	0	2019-01-29	2017-08-21	GR	P17		before
B03-Ch1		FAM	Unknown	5510		33.49	NaN			0.07	33.455	33.42	33.49	2019-01-29	2017-11-15	GR	P17		during
A07-Ch1		FAM	Unknown	5769		39.44	NaN		nest swab	#VALUE!	39.44	39.44	39.44	2019-01-31	2018-02-01	GR	P17		after
C15-Ch1		FAM	Unknown	5744		NaN	NaN			#VALUE!	#DIV/0!	0	0	2019-01-29	2017-08-21	GR	P8	pc x GR P17	before
B05-Ch1		FAM	Unknown	5511		NaN	NaN			#VALUE!	#DIV/0!	0	0	2019-01-29	2017-11-15	GR	P8	pc x GR P17	during
E07-Ch1		FAM	Unknown	5756		38.47	NaN			#VALUE!	38.47	38.47	38.47	2019-01-29	2018-02-01	GR	P8	pc x GR P17	after
B13-Ch1		FAM	Unknown	5808		37.48	NaN			0.03	37.465	37.45	37.48	2019-06-27	2017-08-21	GR	P29	hc x GR P17	before
B05-Ch1		FAM	Unknown	5804		NaN	NaN			#VALUE!	#DIV/0!	0	0	2019-06-27	2017-12-04	GR	P29	hc x GR P17	during
D11-Ch1		FAM	Unknown	5823		NaN	NaN			#VALUE!	#DIV/0!	0	0	2019-06-27	2018-02-01	GR	P29	hc x GR P17	after	PB
D07-Ch1		FAM	Unknown	5748		NaN	NaN			#VALUE!	#DIV/0!	0	0	2019-01-29	2017-08-22	BB	S17		before
B15-Ch1		FAM	Unknown	5516		NaN	NaN			#VALUE!	#DIV/0!	0	0	2019-01-29	2017-11-30	BB	S17		during
D09-Ch1		FAM	Unknown	5749		NaN	NaN			#VALUE!	#DIV/0!	0	0	2019-01-29	2018-02-02	BB	S17		after
D01-Ch1		FAM	Unknown	5745		NaN	NaN			#VALUE!	#DIV/0!	0	0	2019-01-29	2017-08-22	BB	S11	pc x BB S17	before
C01-Ch1		FAM	Unknown	5517		NaN	NaN			#VALUE!	#DIV/0!	0	0	2019-01-29	2017-11-30	BB	S11	pc x BB S17	during
A11-Ch1		FAM	Unknown	5771		NaN	NaN		nest swab	#VALUE!	#DIV/0!	0	0	2019-01-31	2018-02-02	BB	S11	pc x BB S17	after
F07-Ch1		FAM	Unknown	5764		NaN	NaN			#VALUE!	#DIV/0!	0	0	2019-01-29	2017-02-01	BB	S11	pc x BB S17	after
A01-Ch1		FAM	Unknown	5794		NaN	NaN			#VALUE!	39.72	39.72	39.72	2019-06-27	2017-08-24	ST	S16	hc x BB S17	before
A11-Ch1		FAM	Unknown	5799		39.06	NaN			#VALUE!	39.06	39.06	39.06	2019-06-27	2017-11-12	ST	S16	hc x BB S17	during
D05-Ch1		FAM	Unknown	5820		NaN	NaN			#VALUE!	#DIV/0!	0	0	2019-06-27	2018-01-31	ST	S16	hc x BB S17	after	PB
C07-Ch1		FAM	Unknown	5740		NaN	NaN			#VALUE!	#DIV/0!	0	0	2019-01-29	2016-09-21	BB	S12		before
B03-Ch1		FAM	Unknown	5504	nest	NaN	NaN			#VALUE!	#DIV/0!	0	0	2018-12-11	2016-12-20	BB	S12		during
B01-Ch1		FAM	Unknown	5774		NaN	NaN		nest swab	#VALUE!	#DIV/0!	0	0	2019-01-31	2017-02-01	BB	S12		after
E05-Ch1		FAM	Unknown	5755		NaN	NaN			#VALUE!	#DIV/0!	0	0	2019-01-29	2016-09-21	BB	S13	pc x BB S12	before
A11-Ch1		FAM	Unknown	5505		NaN	NaN			#VALUE!	#DIV/0!	0	0	2019-01-29	2016-12-20	BB	S13	pc x BB S12	during
B13-Ch1		FAM	Unknown	5780		NaN	NaN		nest swab	#VALUE!	#DIV/0!	0	0	2019-01-31	2017-02-27	BB	S13	pc x BB S12	after
C15-Ch1		FAM	Unknown	5817		NaN	NaN			#VALUE!	#DIV/0!	0	0	2019-06-27	2016-09-22	ME	E10	hc x BB S12	before
E07-Ch1		FAM	Unknown	5829		NaN	NaN			#VALUE!	#DIV/0!	0	0	2019-06-27	2016-12-10	ME	E10	hc x BB S12	during
C07-Ch1		FAM	Unknown	5813		NaN	NaN			#VALUE!	#DIV/0!	0	0	2019-06-27	2017-01-25	ME	E10	hc x BB S12	after	PB
C11-Ch1		FAM	Unknown	5742		38.34	NaN			#VALUE!	38.34	38.34	38.34	2019-01-29	2017-08-24	ST	S4		before
A01-Ch1		FAM	Unknown	5496		NaN	NaN			#VALUE!	#DIV/0!	0	0	2019-01-29	2017-12-12	ST	S4		during
B09-Ch1		FAM	Unknown	5778		NaN	NaN		nest swab	#VALUE!	#DIV/0!	0	0	2019-01-31	2018-01-31	ST	S4		after
E01-Ch1		FAM	Unknown	5753		NaN	NaN			#VALUE!	#DIV/0!	0	0	2019-01-29	2017-08-24	ST	S29	pc x ST S4	before
A03-Ch1		FAM	Unknown	5497		NaN	NaN			#VALUE!	#DIV/0!	0	0	2019-01-29	2017-12-12	ST	S29	pc x ST S4	during
B11-Ch1		FAM	Unknown	5779		NaN	NaN		nest swab	#VALUE!	#DIV/0!	0	0	2019-01-31	2018-01-31	ST	S29	pc x ST S4	after
A03-Ch1		FAM	Unknown	5795		NaN	NaN			#VALUE!	#DIV/0!	0	0	2019-06-27	2017-08-24	ST	S20	hc x ST S4	before
A07-Ch1		FAM	Unknown	5797		NaN	NaN			#VALUE!	#DIV/0!	0	0	2019-06-27	2017-11-12	ST	S20	hc x ST S4	during
D03-Ch1		FAM	Unknown	5819		NaN	NaN			#VALUE!	#DIV/0!	0	0	2019-06-27	2018-01-31	ST	S20	hc x ST S4	after	PB
D15-Ch1		FAM	Unknown	5752		NaN	NaN			#VALUE!	#DIV/0!	0	0	2019-01-29	2017-08-22	BB	S3		before
B11-Ch1		FAM	Unknown	5514		NaN	NaN			#VALUE!	#DIV/0!	0	0	2019-01-29	2017-11-14	BB	S3		during
B03-Ch1		FAM	Unknown	5775		NaN	NaN		nest swab	#VALUE!	#DIV/0!	0	0	2019-01-31	2018-02-02	BB	S3		after
D03-Ch1		FAM	Unknown	5746		NaN	NaN			#VALUE!	#DIV/0!	0	0	2019-01-29	2017-08-22	BB	S4	pc x BB S3	before
B13-Ch1		FAM	Unknown	5515		39.67	NaN			#VALUE!	39.67	39.67	39.67	2019-01-29	2017-11-15	BB	S4	pc x BB S3	during
B05-Ch1		FAM	Unknown	5776		NaN	NaN		nest swab	#VALUE!	#DIV/0!	0	0	2019-01-31	2018-02-02	BB	S4	pc x BB S3	after
A05-Ch1		FAM	Unknown	5796		NaN	NaN			#VALUE!	#DIV/0!	0	0	2019-06-27	2017-08-22	BB	N7	hc x BB S3	before
B07-Ch1		FAM	Unknown	5805		NaN	NaN			#VALUE!	#DIV/0!	0	0	2019-06-27	2017-11-20	BB	N7	hc x BB S3	during
B11-Ch1		FAM	Unknown	5807		NaN	NaN			#VALUE!	#DIV/0!	0	0	2019-06-27	2018-02-08	BB	N7	hc x BB S3	after	PB
D05-Ch1		FAM	Unknown	5747		NaN	NaN			#VALUE!	#DIV/0!	0	0	2019-01-29	2016-10-10	BB	W10		before
A05-Ch1		FAM	Unknown	5498		33.19	NaN			-0.35	33.365	33.19	33.54	2019-01-29	2016-11-25	BB	W10		during
A09-Ch1		FAM	Unknown	5770		31.96	NaN		nest swab	1.72	31.1	30.24	31.96	2019-01-31	2017-01-31	BB	W10		after
E11-Ch1		FAM	Unknown	5758		NaN	NaN			#VALUE!	#DIV/0!	0	0	2019-01-29	2016-09-19	BB	W2	pc x BB W10	before
A07-Ch1		FAM	Unknown	5499		NaN	NaN			#VALUE!	#DIV/0!	0	0	2019-01-29	2016-11-25	BB	W2	pc x BB W10	during
A01-Ch1		FAM	Unknown	5766		NaN	NaN		nest swab	#VALUE!	#DIV/0!	0	0	2019-01-31	2017-01-31	BB	W2	pc x BB W10	after
B09-Ch1		FAM	Unknown	5806		38.96	NaN			#VALUE!	38.96	38.96	38.96	2019-06-27	2016-09-22	ME	E4	hc x BB W10	before
C03-Ch1		FAM	Unknown	5811		NaN	NaN			#VALUE!	35.03	35.03	35.03	2019-06-27	2016-10-26	ME	E4	hc x BB W10	before
D15-Ch1		FAM	Unknown	5825		39.59	NaN			#VALUE!	39.59	39.59	39.59	2019-06-27	2016-12-10	ME	E4	hc x BB W10	during
D13-Ch1		FAM	Unknown	5824		NaN	NaN			#VALUE!	#DIV/0!	0	0	2019-06-27	2016-12-18	ME	E4	hc x BB W10	after	PF (failed)
A15-Ch1		FAM	Unknown	5801		NaN	NaN			#VALUE!	#DIV/0!	0	0	2019-06-27	2017-01-25	ME	E4	hc x BB W10	after	PB
C05-Ch1		FAM	Unknown	5739		NaN	NaN			#VALUE!	#DIV/0!	0	0	2019-01-29	2016-10-10	BB	W9		before
B05-Ch1		FAM	Unknown	5506	nest	NaN	NaN			#VALUE!	#DIV/0!	0	0	2018-12-11	2016-12-20	BB	W9		during
A05-Ch1		FAM	Unknown	5768		NaN	NaN		nest swab	#VALUE!	#DIV/0!	0	0	2019-01-31	2017-01-31	BB	W9		after
E09-Ch1		FAM	Unknown	5757		NaN	NaN			#VALUE!	#DIV/0!	0	0	2019-01-29	2016-09-19	BB	W3	pc x BB W9	before
A13-Ch1		FAM	Unknown	5507		NaN	NaN			#VALUE!	#DIV/0!	0	0	2019-01-29	2016-12-20	BB	W3	pc x BB W9	during
A03-Ch1		FAM	Unknown	5767		NaN	NaN		nest swab	#VALUE!	#DIV/0!	0	0	2019-01-31	2017-01-31	BB	W3	pc x BB W9	after
B15-Ch1		FAM	Unknown	5809		NaN	NaN			#VALUE!	#DIV/0!	0	0	2019-06-27	2016-09-19	BB	C11	hc x BB W9	before
B03-Ch1		FAM	Unknown	5803		NaN	NaN			#VALUE!	#DIV/0!	0	0	2019-06-27	2016-10-30	BB	C11	hc x BB W9	before
E05-Ch1		FAM	Unknown	5828		NaN	NaN			#VALUE!	#DIV/0!	0	0	2019-06-27	2016-12-07	BB	C11	hc x BB W9	during
E03-Ch1		FAM	Unknown	5827		NaN	NaN			#VALUE!	#DIV/0!	0	0	2019-06-27	2017-01-31	BB	C11	hc x BB W9	after	PB
F01-Ch1		FAM	Unknown	5761		37.4	NaN			-0.66	37.73	37.4	38.06	2019-01-29	2016-09-22	ME	W8		before
B01-Ch1		FAM	Unknown	5502	nest	37.46	NaN			0	37.46	37.46	37.46	2018-12-11	2016-12-10	ME	W8		during
F05-Ch1		FAM	Unknown	5763		NaN	NaN			#VALUE!	39.29	39.29	39.29	2019-01-29	2017-01-25	ME	W8		after
E03-Ch1		FAM	Unknown	5754		NaN	NaN			#VALUE!	#DIV/0!	0	0	2019-01-29	2016-09-22	ME	W7	pc x ME W8	before
F03-Ch1		FAM	Unknown	5762		NaN	NaN			#VALUE!	#DIV/0!	0	0	2019-01-29	2017-01-25	ME	W7	pc x ME W8	after
C13-Ch1		FAM	Unknown	5816		NaN	NaN			#VALUE!	#DIV/0!	0	0	2019-06-27	2016-09-22	ME	W4	hc x ME W8	before
A13-Ch1		FAM	Unknown	5800		NaN	NaN			#VALUE!	#DIV/0!	0	0	2019-06-27	2016-10-26	ME	W4	hc x ME W8	before?
B01-Ch1		FAM	Unknown	5802		NaN	NaN			#VALUE!	#DIV/0!	0	0	2019-06-27	2016-11-08	ME	W4	hc x ME W8	during
C05-Ch1		FAM	Unknown	5812		NaN	NaN			#VALUE!	38.96	38.96	38.96	2019-06-27	2017-01-25	ME	W4	hc x ME W8	after	PB

## Sheet: hatching fledging success
	healthy control nests												infected nests
																									hatching success	fledging success	breeding success
year	site	nest	n eggs	n chicks hatched	n chicks fledged	hatching success	fledging success	breeding success				year	site	nest	n eggs	n chicks hatched	n chicks fledged	hatching success	fledging success	breeding success				nests with BFDV+ bird	92.8788	70.5628	66.4719
2016	ST	W8	9	9	9	100	100	100				2016	BB	C4	6	6	4	100	66.6667	66.6667				nests with BFDV- birds	87.1212	88.6364	79.5455
	ME	E10	6	6	6	100	100	100					BB	S12	7	7	4	100	57.1429	57.1429
	ME	E4	6	4	0	66.6667	0	0					BB	W10	7	7	6	100	85.7143	85.7143
	BB	C11	5	5	5	100	100	100					ME	W8	6	5	0	83.3333	0	0
	ME	W4	6	6	6	100	100	100					BB	W9	5	4	4	80	100	80
2017	BB	C15	7	7	7	100	100	100				2017	ME	E4	6	6	4	100	66.6667	66.6667
	ST	W7	6	5	5	83.3333	100	83.3333					ME	N1	6	6	6	100	100	100
	GR	P29	6	4	4	66.6667	100	66.6667					GR	P17	6	5	0	83.3333	0	0
	ST	S16	4	3	3	75	100	75					BB	S17	6	6	6	100	100	100
	ST	S20	6	6	6	100	100	100					BB	S3	6	6	6	100	100	100
	BB	N7	6	4	3	66.6667	75	50					ST	S4	4	3	3	75	100	75
		MEAN	6.09091	5.36364	4.90909	87.1212	88.6364	79.5455						MEAN	5.90909	5.54545	3.90909	92.8788	70.5628	66.4719
		SD	1.1642	1.61091	2.27454	14.8067	28.9271	30.0176						SD	0.792527	1.15708	2.10862	9.64237	36.5948	34.275
		CI lower	5.31	4.28	3.39	77.17	69.21	59.38						CI lower	5.38	4.77	2.49	86.4	45.98	43.44
		CI upper	6.87	6.44	6.43	97.07	108.07	99.72						CI upper	6.44	6.33	5.33	99.36	95.14	89.5
							CI > 100, as treated as mean for calculating CI, not as proportion
		subtract lower	0.780909	1.08364	1.51909	9.95121	19.4264	20.1655						subtract lower	0.529091	0.775455	1.41909	6.47879	24.5828	23.0319
		subtract upper	0.779091	1.07636	1.52091	9.94879	19.4336	20.1745						subtract upper	0.530909	0.784545	1.42091	6.48121	24.5772	23.0281
		binomial SE				0.101	0.095677	0.12161						binomial SE				0.0775362	0.137421	0.142342
		in %				10.1	9.6	12.2						in %				7.75362	13.7	14.2
		subtract lower				77.0212	79.0364	67.3455										7.75362	13.7	14.2
		subtract upper				97.2212	98.2364	91.7455

## Sheet: extraction blanks
Fluorophore	Sample Name	Cq	Quantity	Cq min	Cq max	Cq Difference	Average	Delta Ct	date run
FAM	NTC extr (for samples 4737 - 4635)	38.37	NaN	38.37	39.17	-0.8	38.77	20.34	2018-06-18
FAM	NTC 4714 - 4736	39.7	NaN	37.13	39.7	2.57	38.415	#DIV/0!	2018-06-22
FAM	NTC 4691 - 4713	NaN	NaN	NaN	37.43	#VALUE!	37.43	#DIV/0!	2018-06-22
FAM	NTC for 4638 - 4854	NaN	NaN	NaN	37.8	#VALUE!	37.8	19.29	2018-06-25
